# Supplementary material
Source: publisher figshare collection journal article supplement (https://sage.figshare.com/ndownloader/files/14501810)

## Supplementary file 2: Forest plots for 8 SF-36 domains

### Physical Function

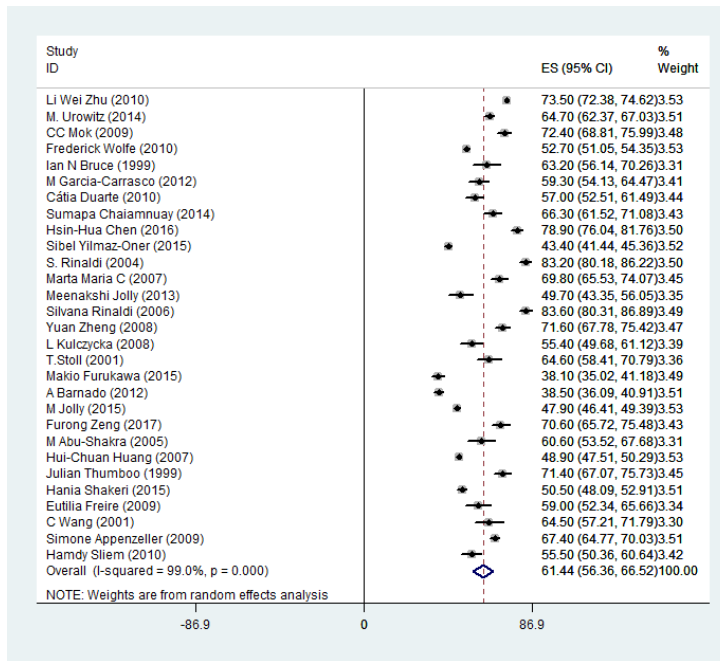

### Role Physical

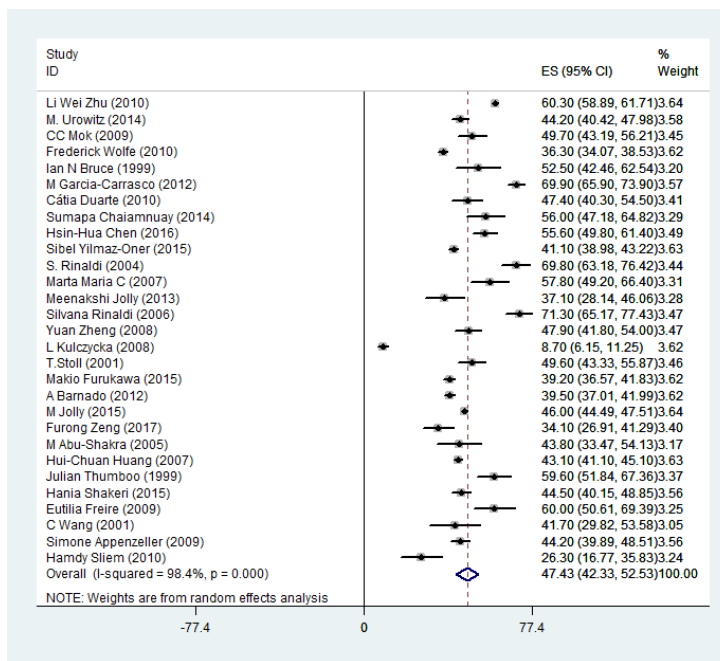

## Bodily Pain

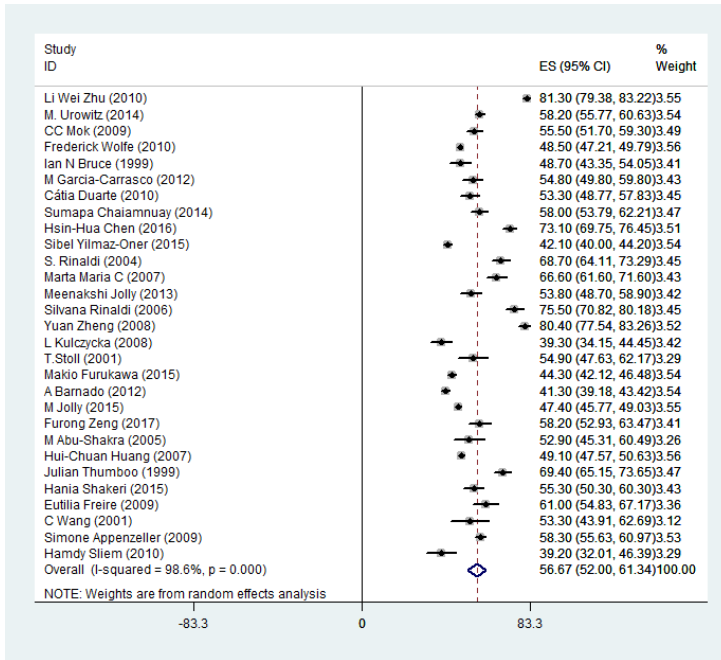

## General Health

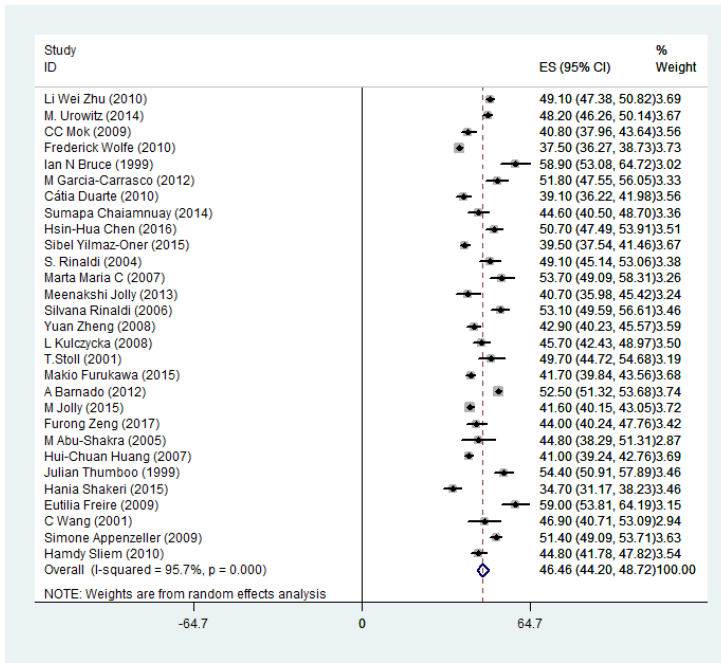

## Vitality

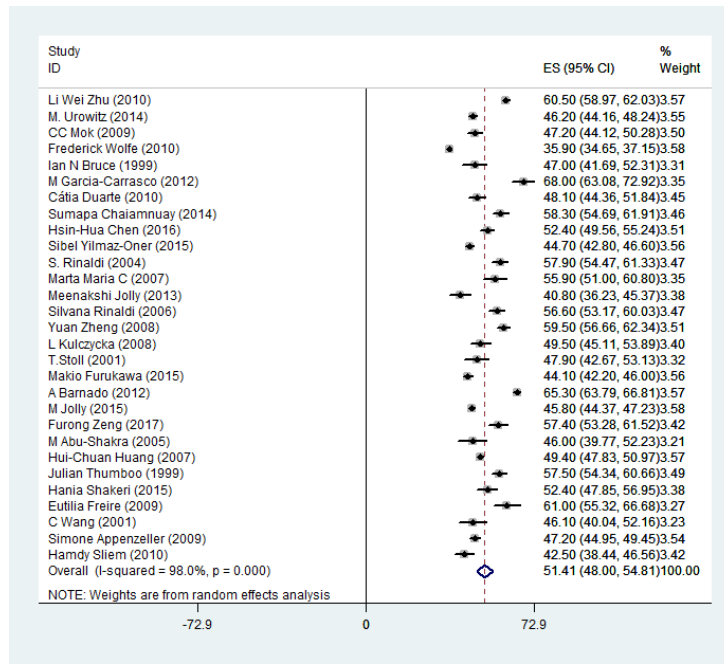

## Social Function

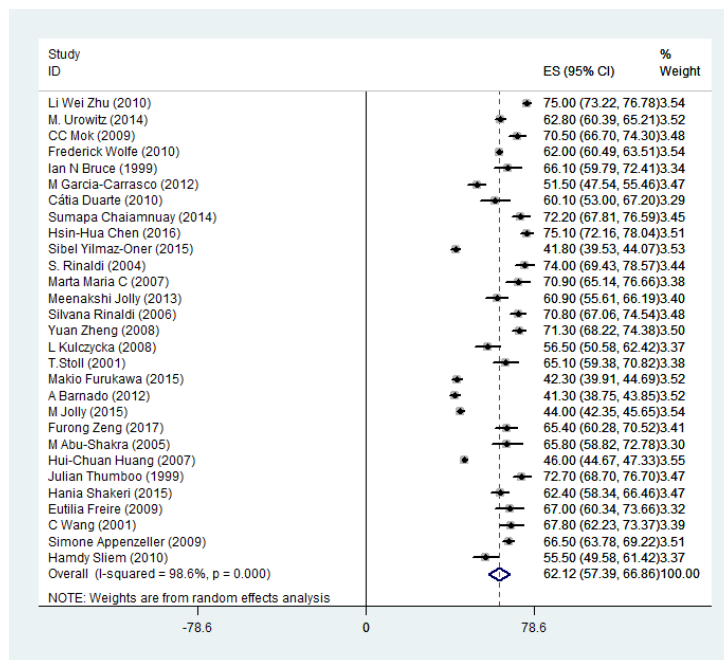

## Role Emotional

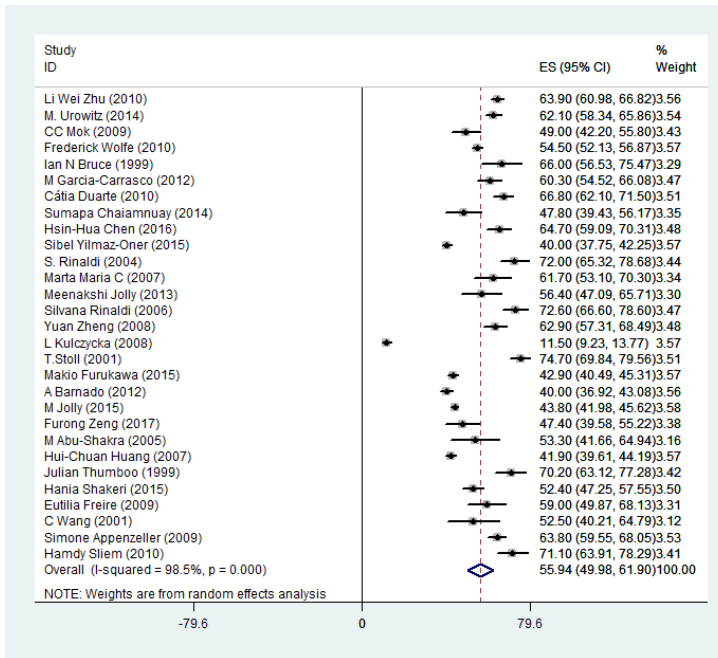

## Mental Health

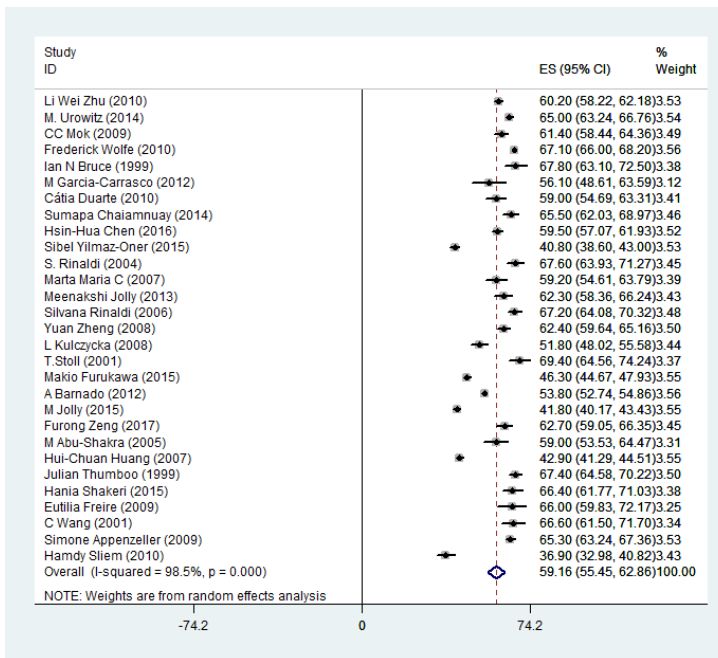

Supplement: Supplementary file 1 [file 14501810]
